# Supplementary material for: Molecular Inferences Suggest Multiple Host Shifts of Rabies Viruses from Bats to Mesocarnivores in Arizona during 2001–2009
Source: PubMed Central journal article supplement (PMC3380930; doi:10.1371/journal.ppat.1002786), 2012-06-21

Figure S3A

I  
V

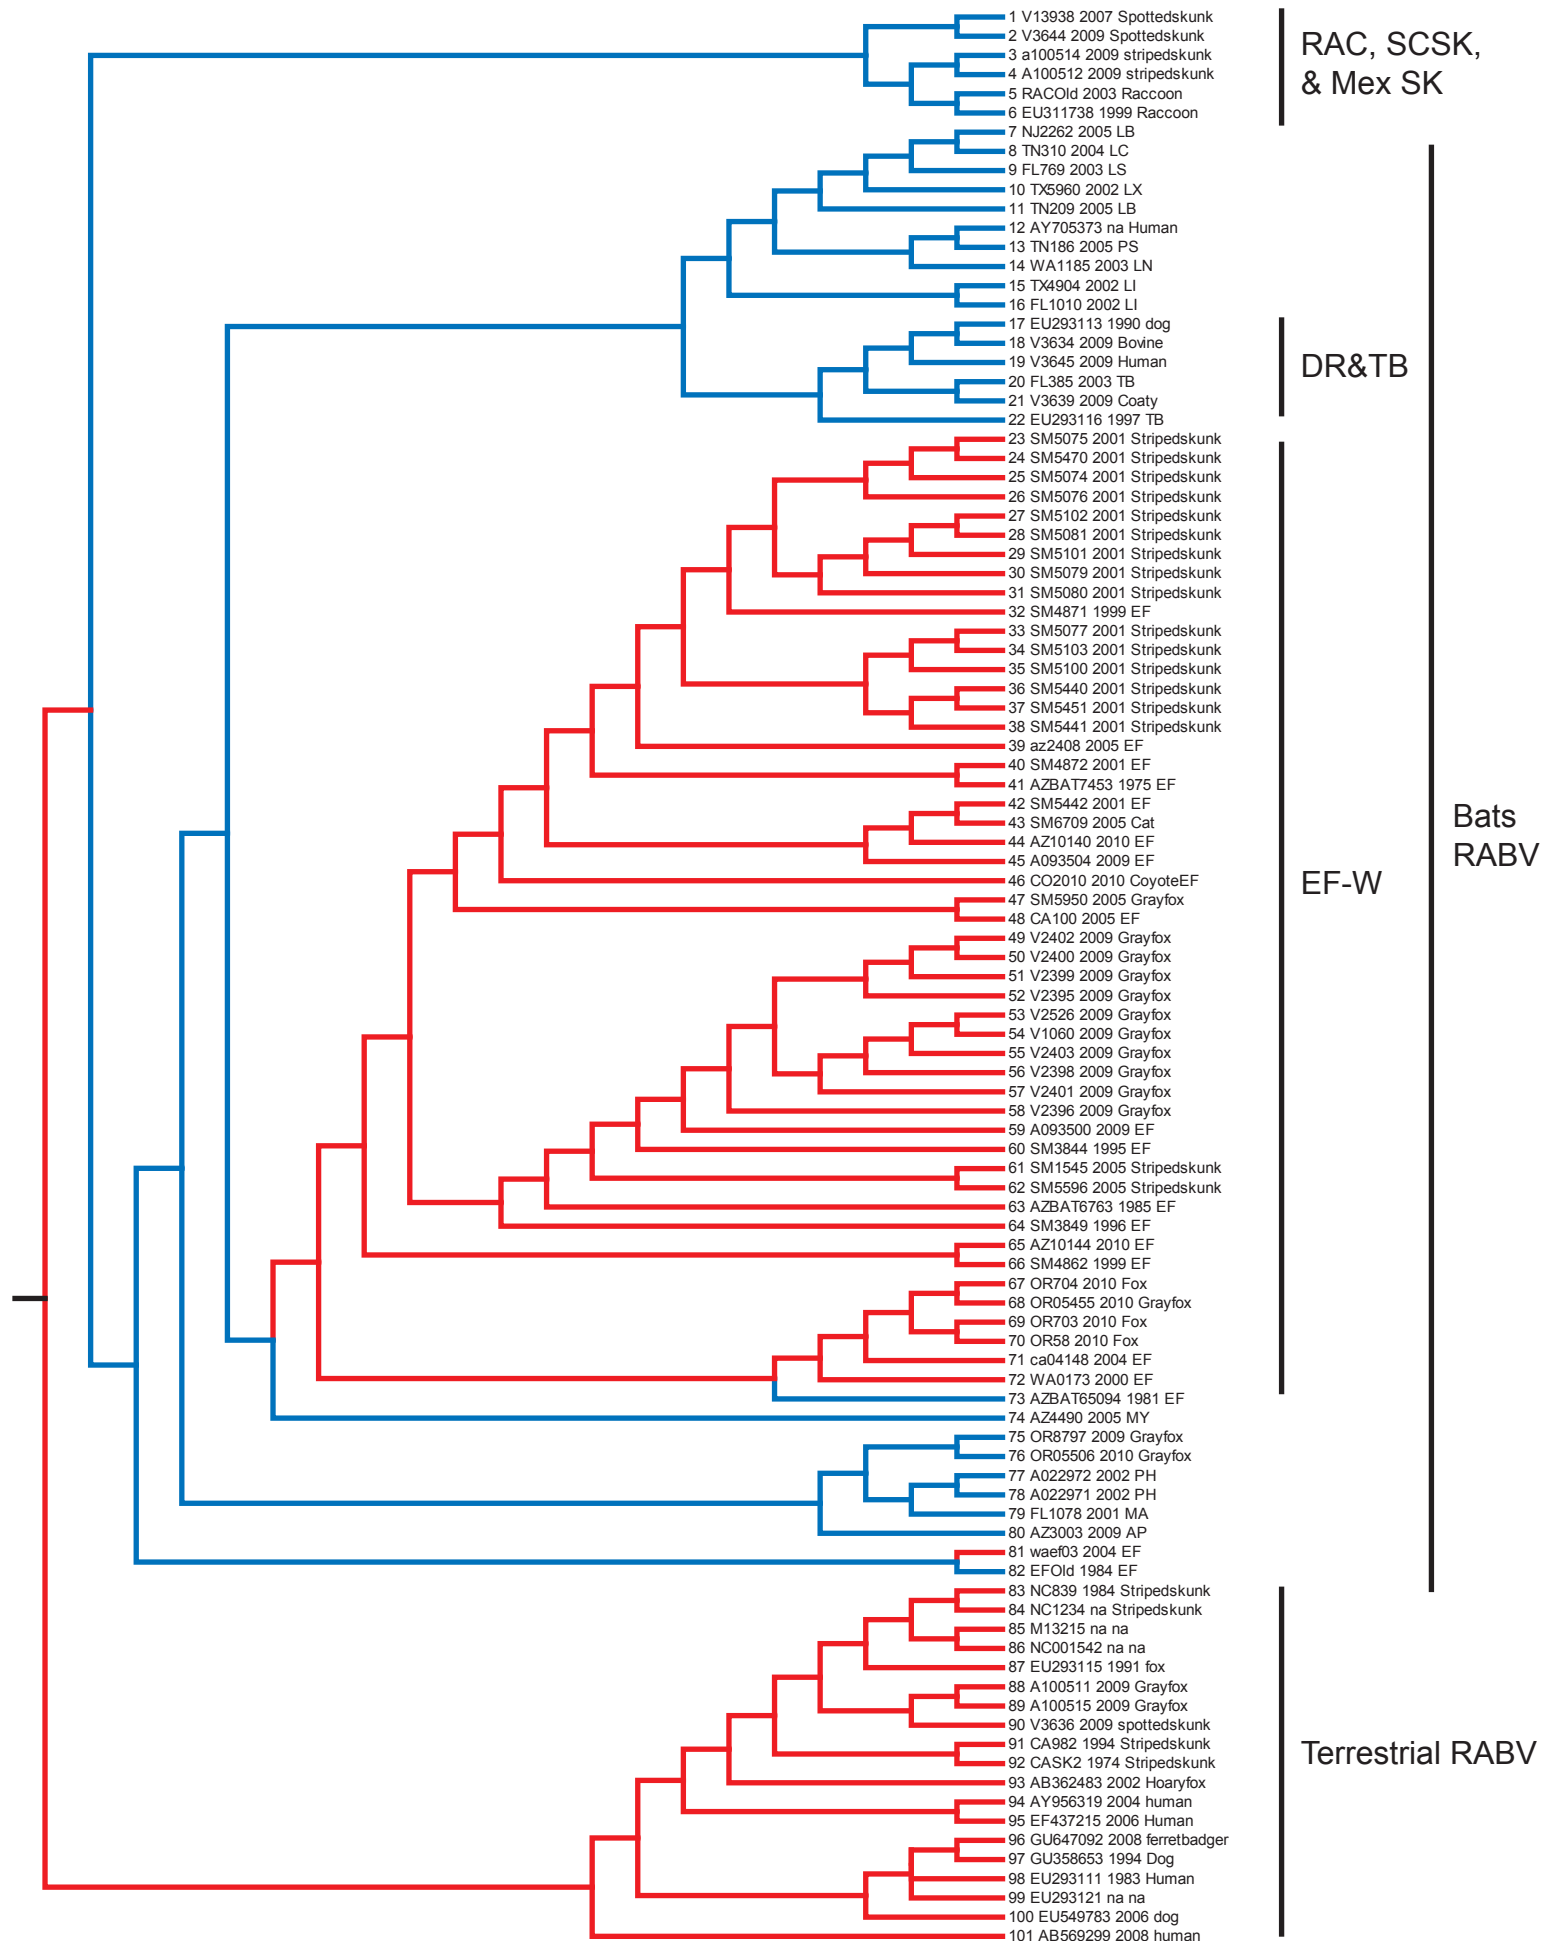

Figure S3B

— N  
 — D  
 — Others

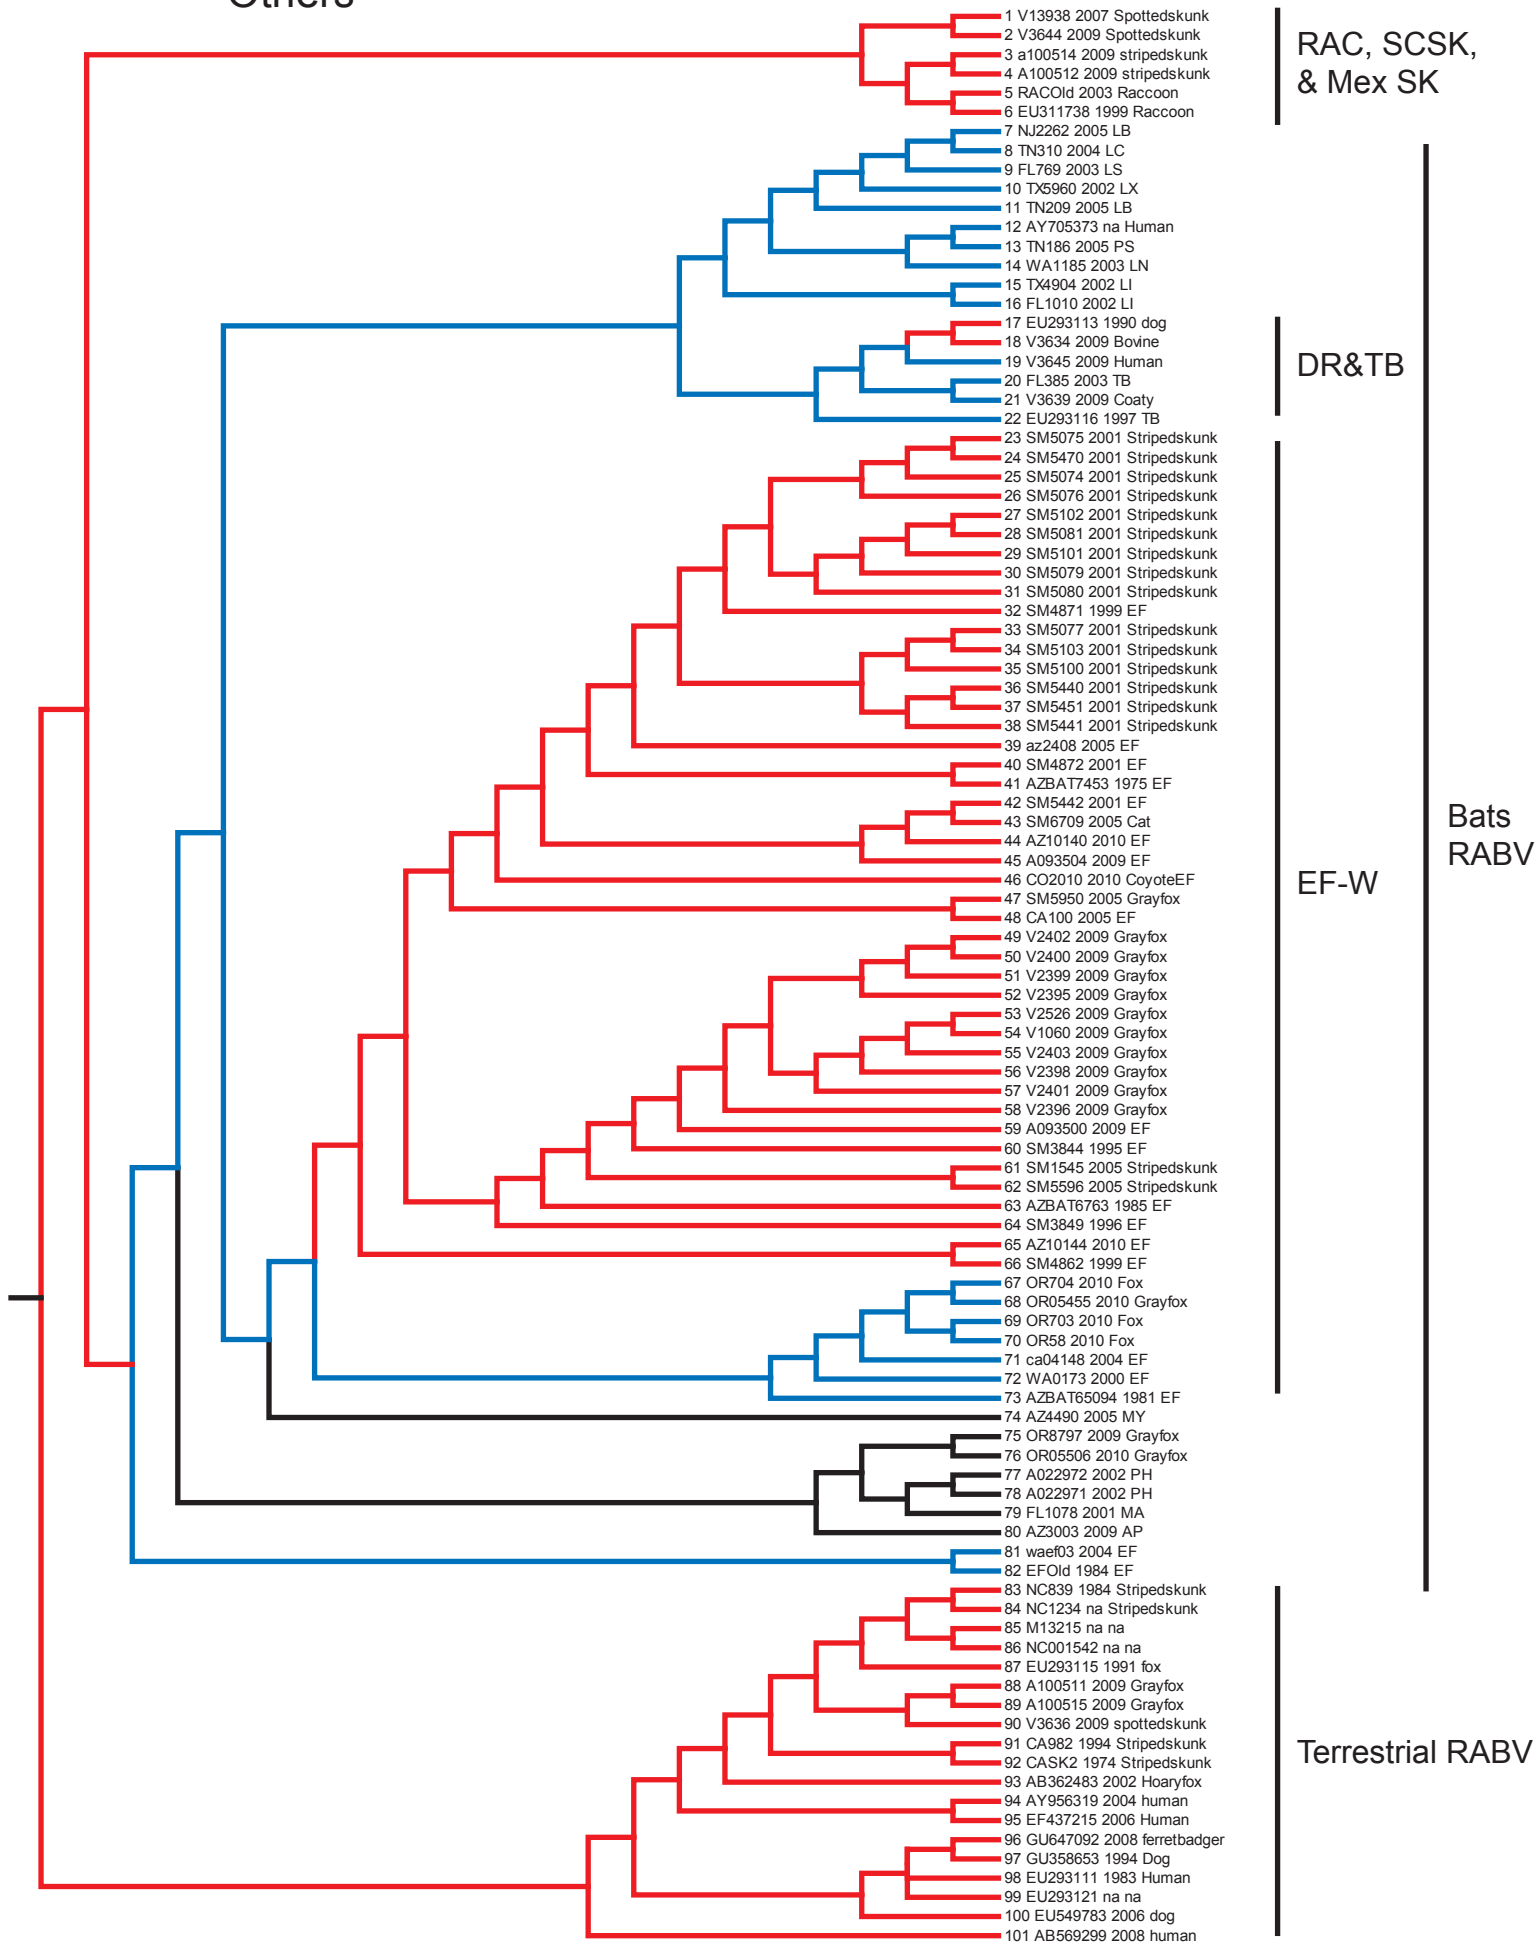

Figure S3C

— S  
— N

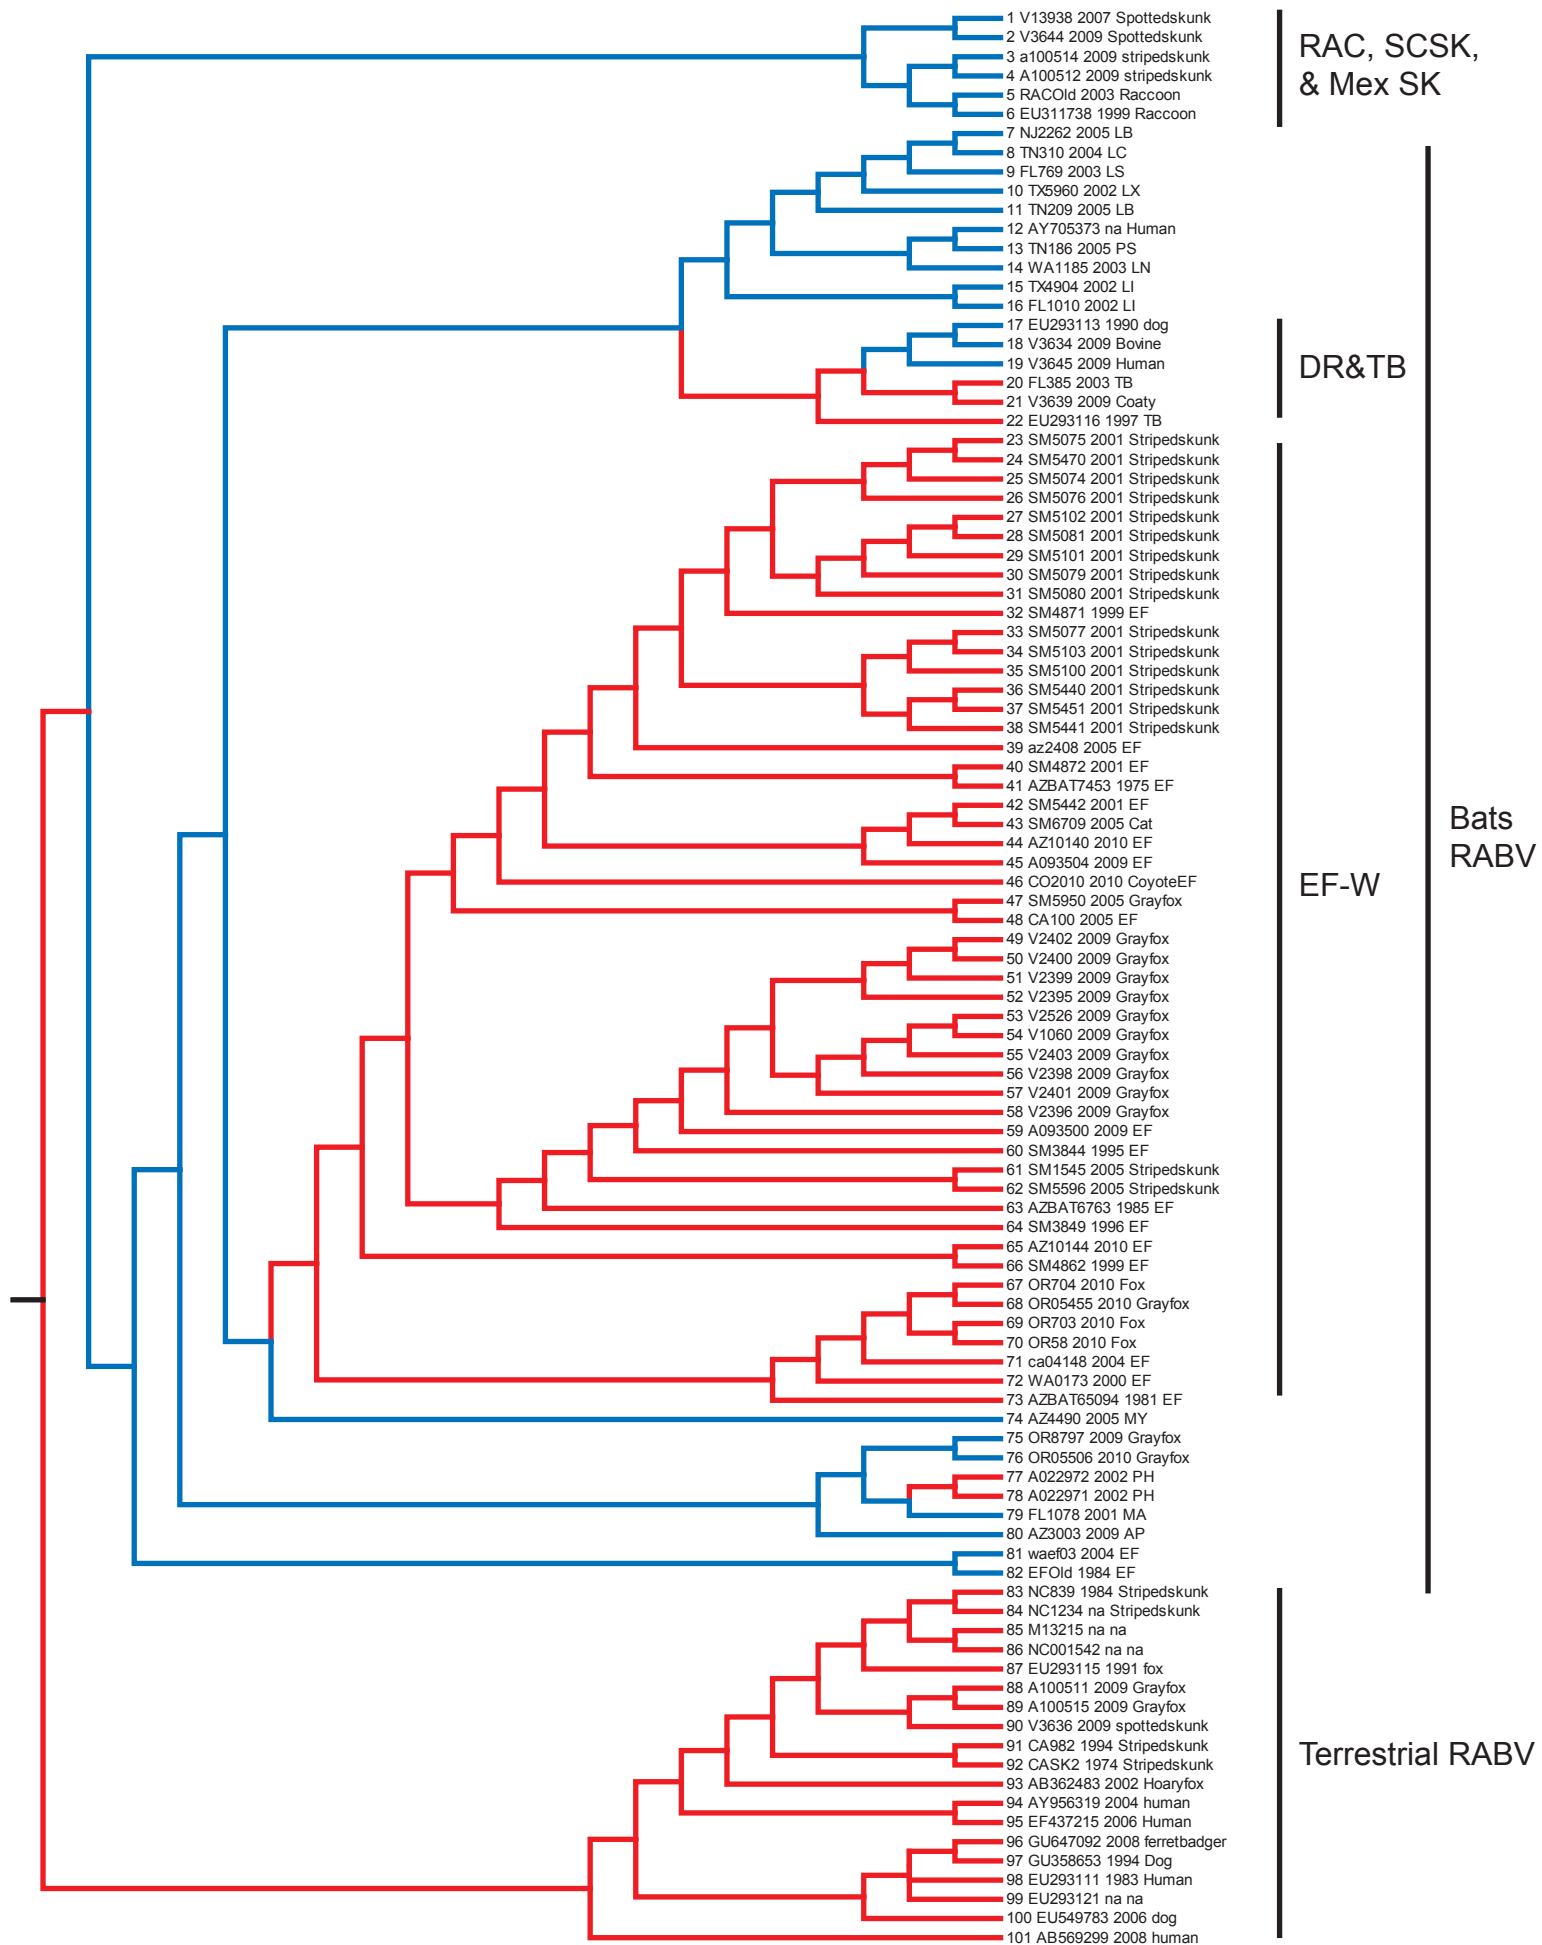

Figure S3D

— K  
— R

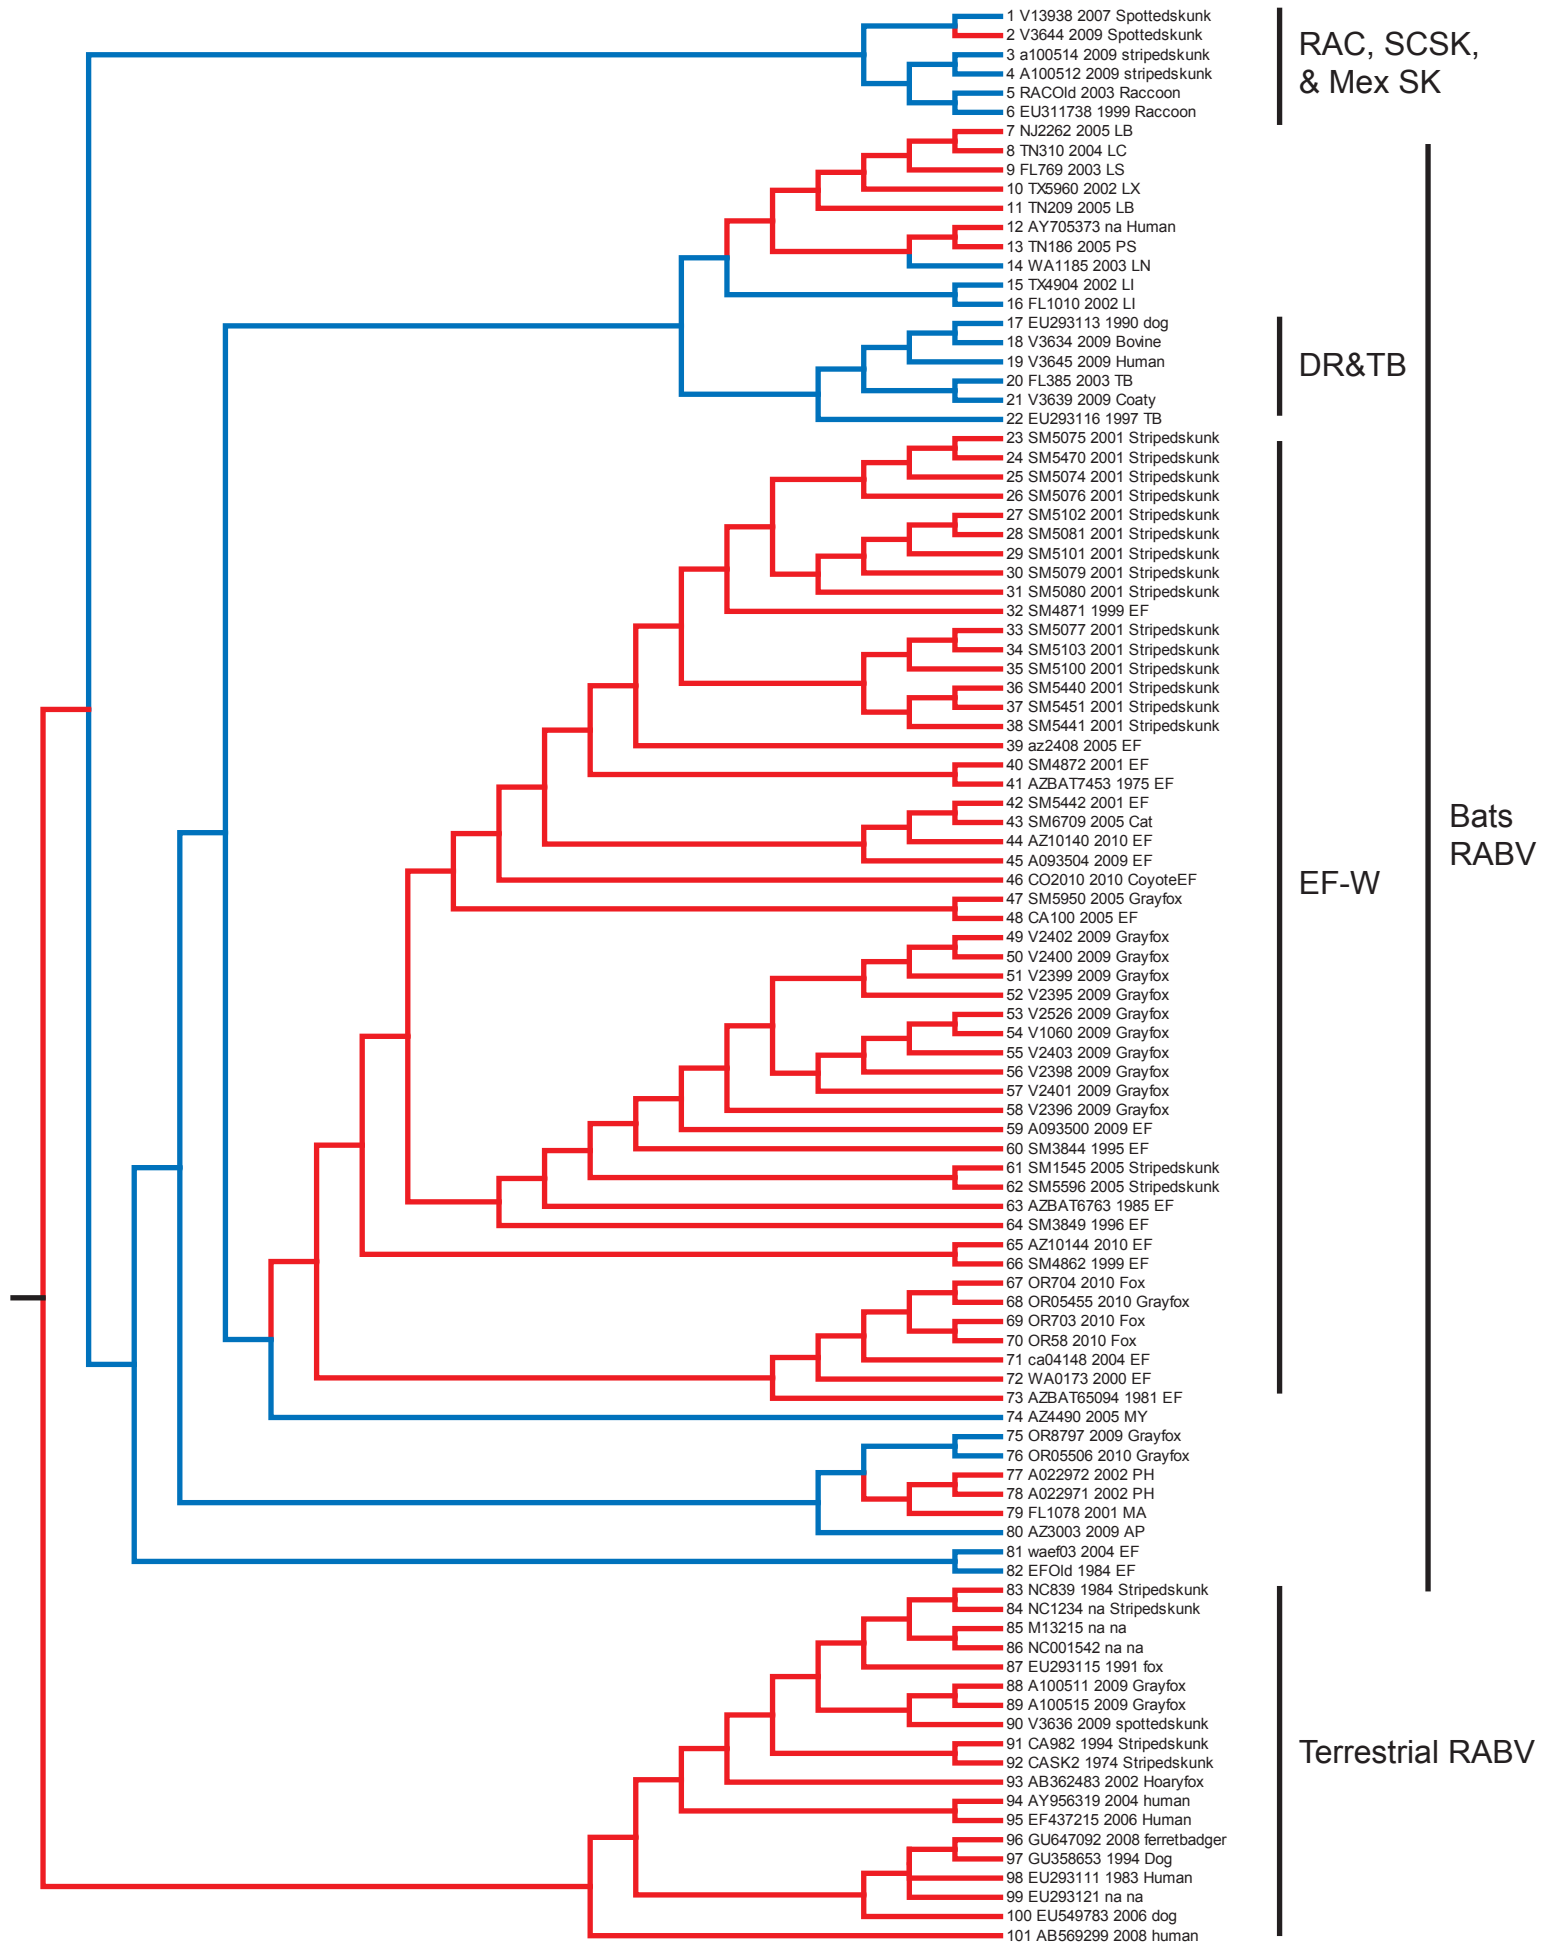

Figure S3E

— R  
— K

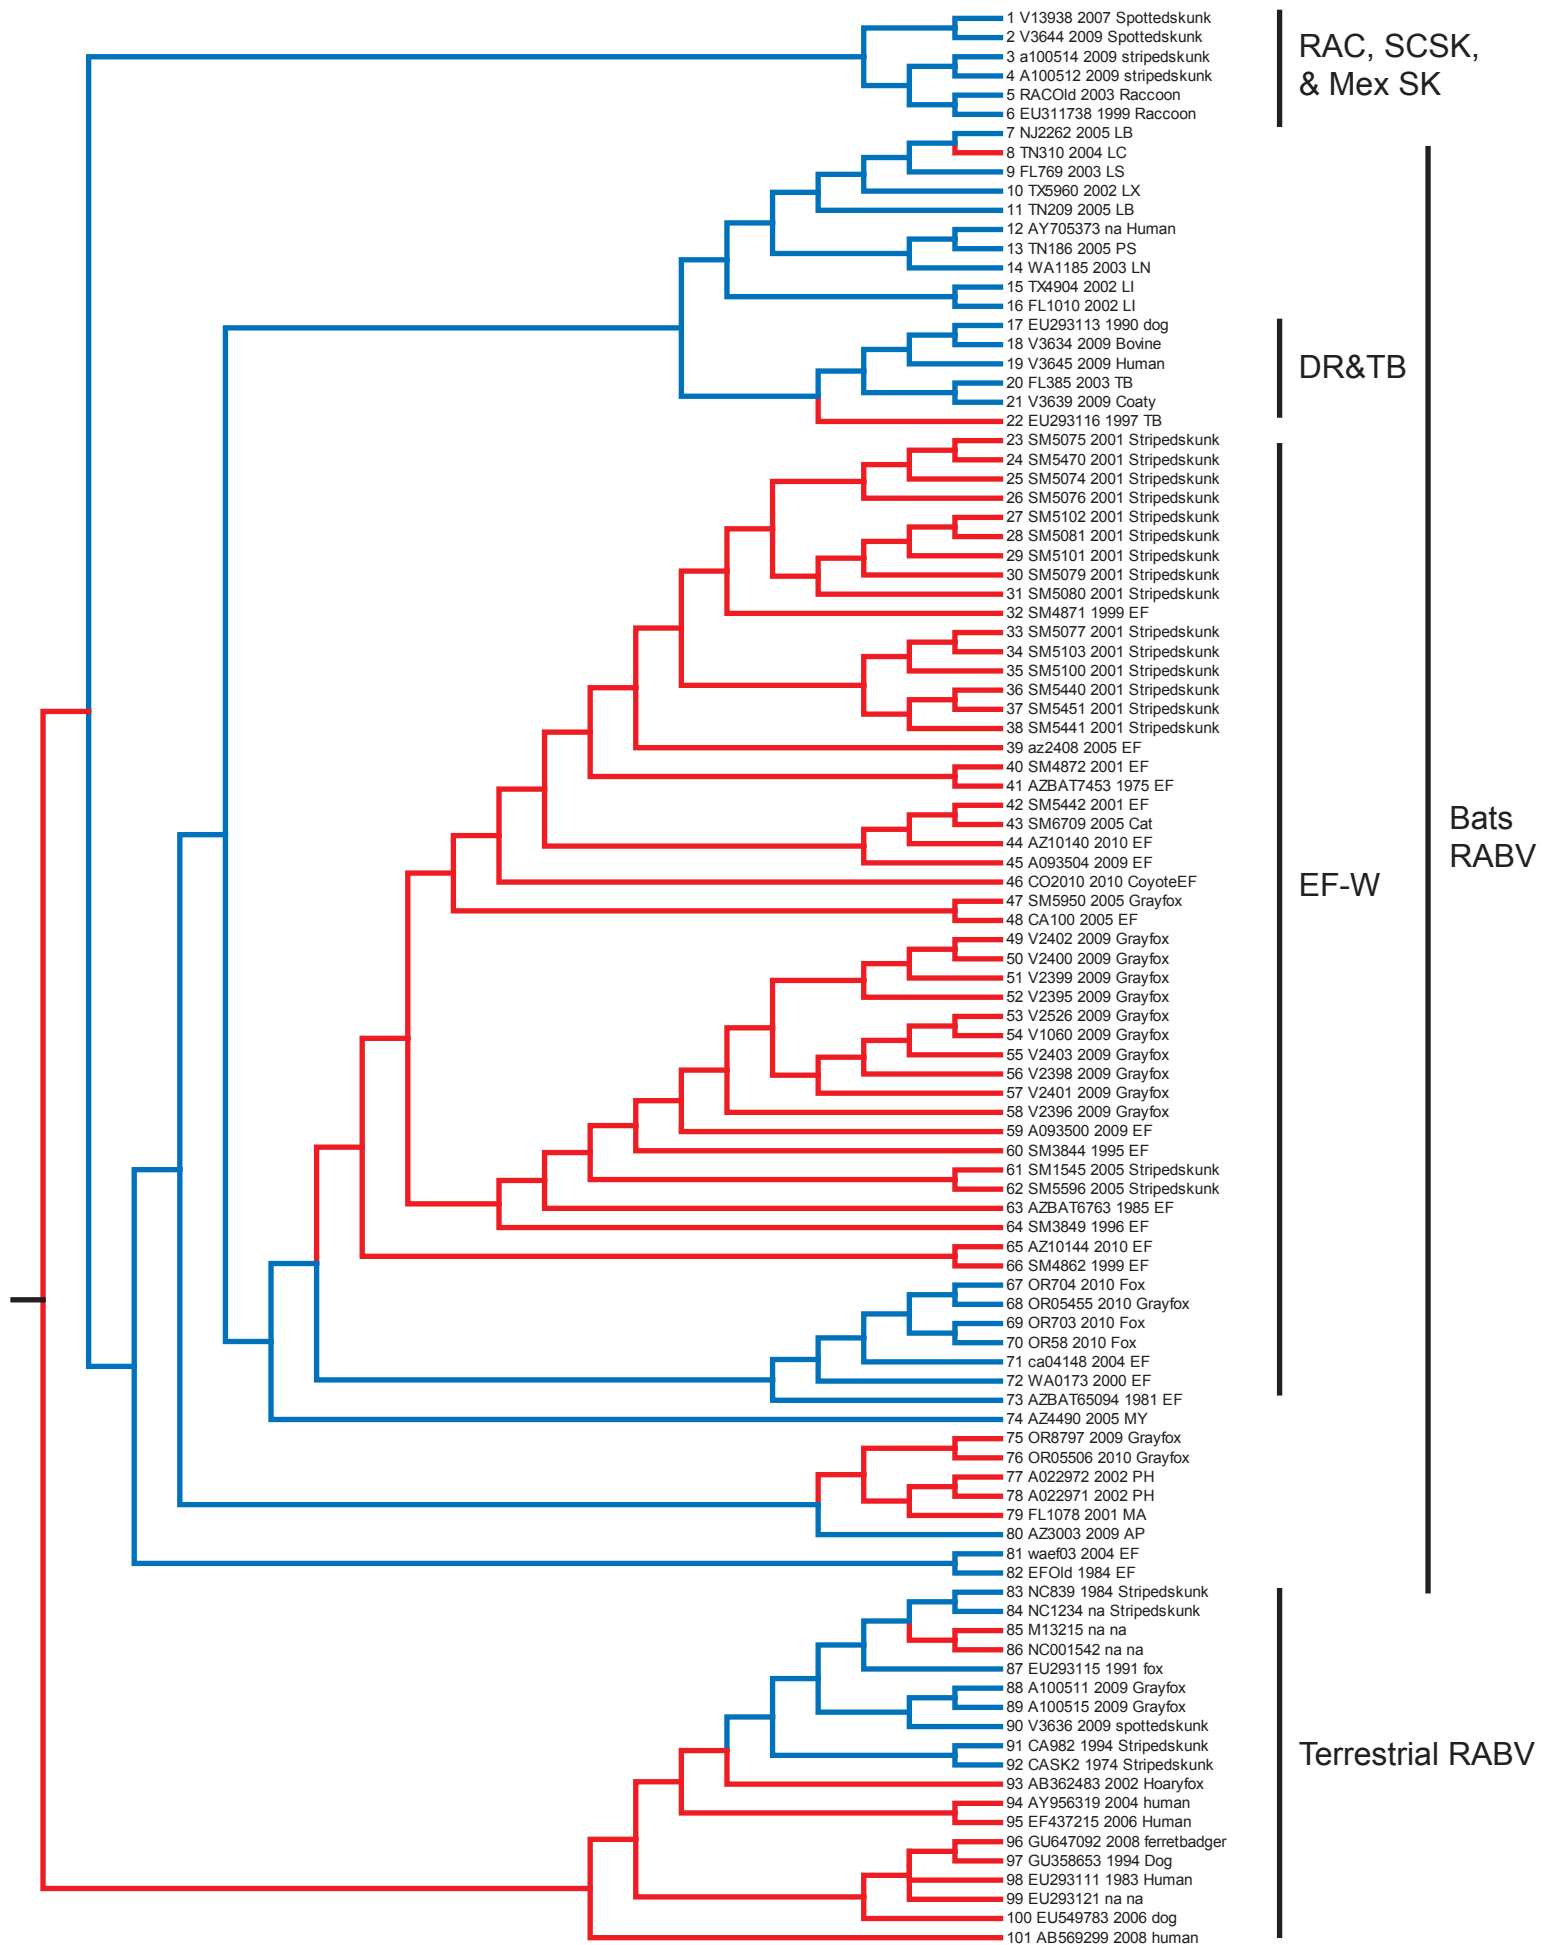

Figure S3F

— P  
— S

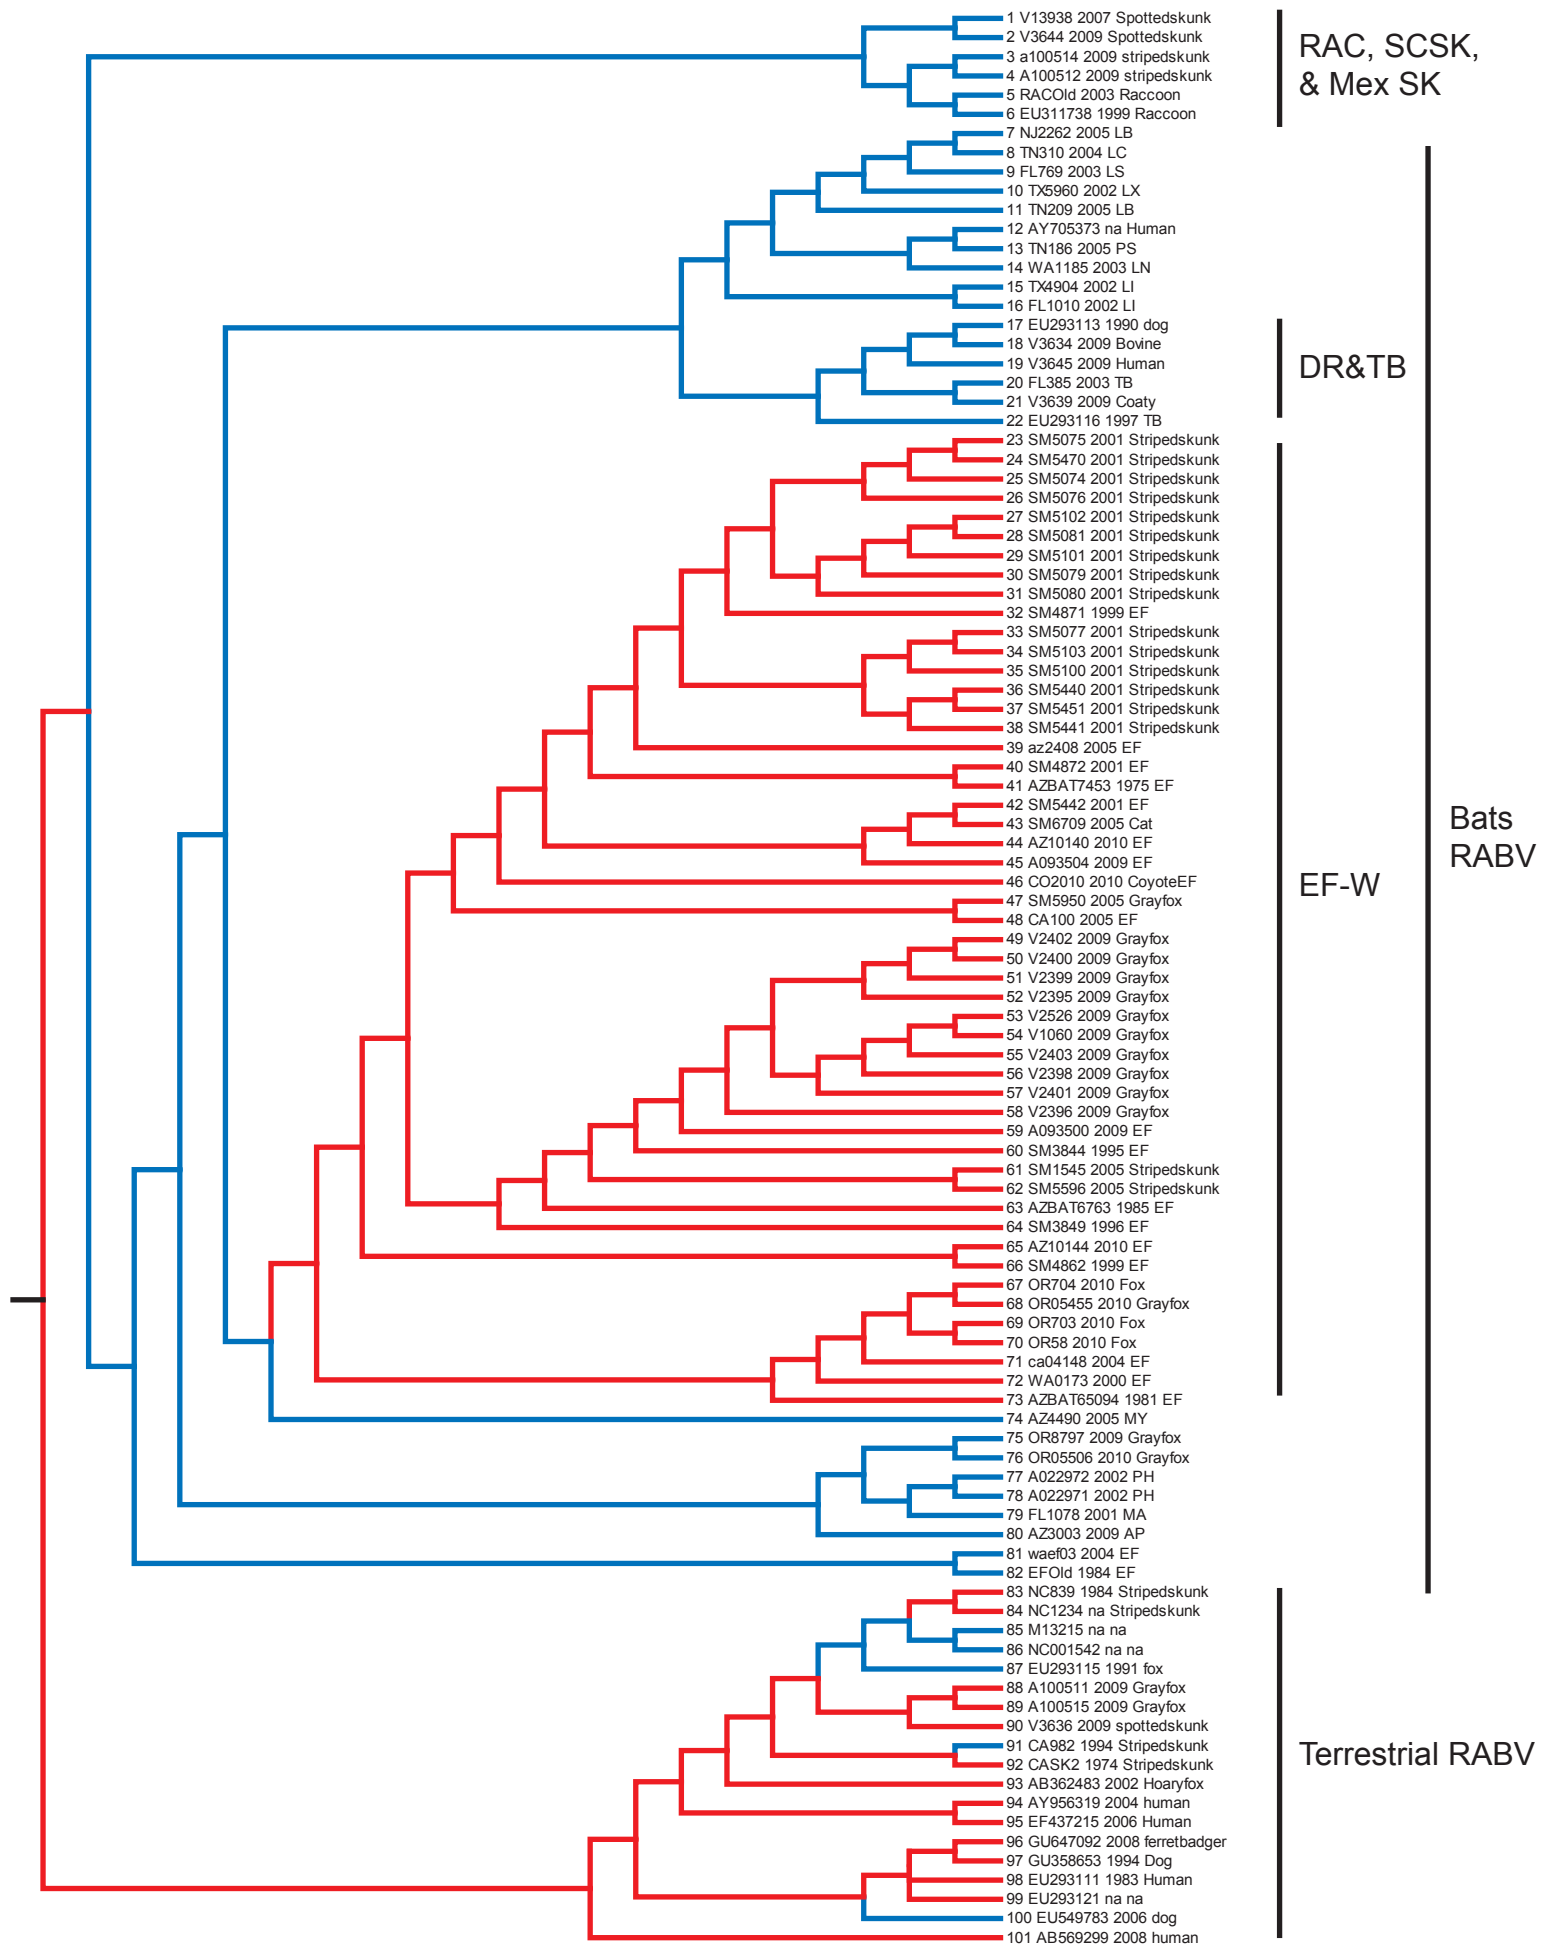

Figure S3G

— V — T  
 — A — S

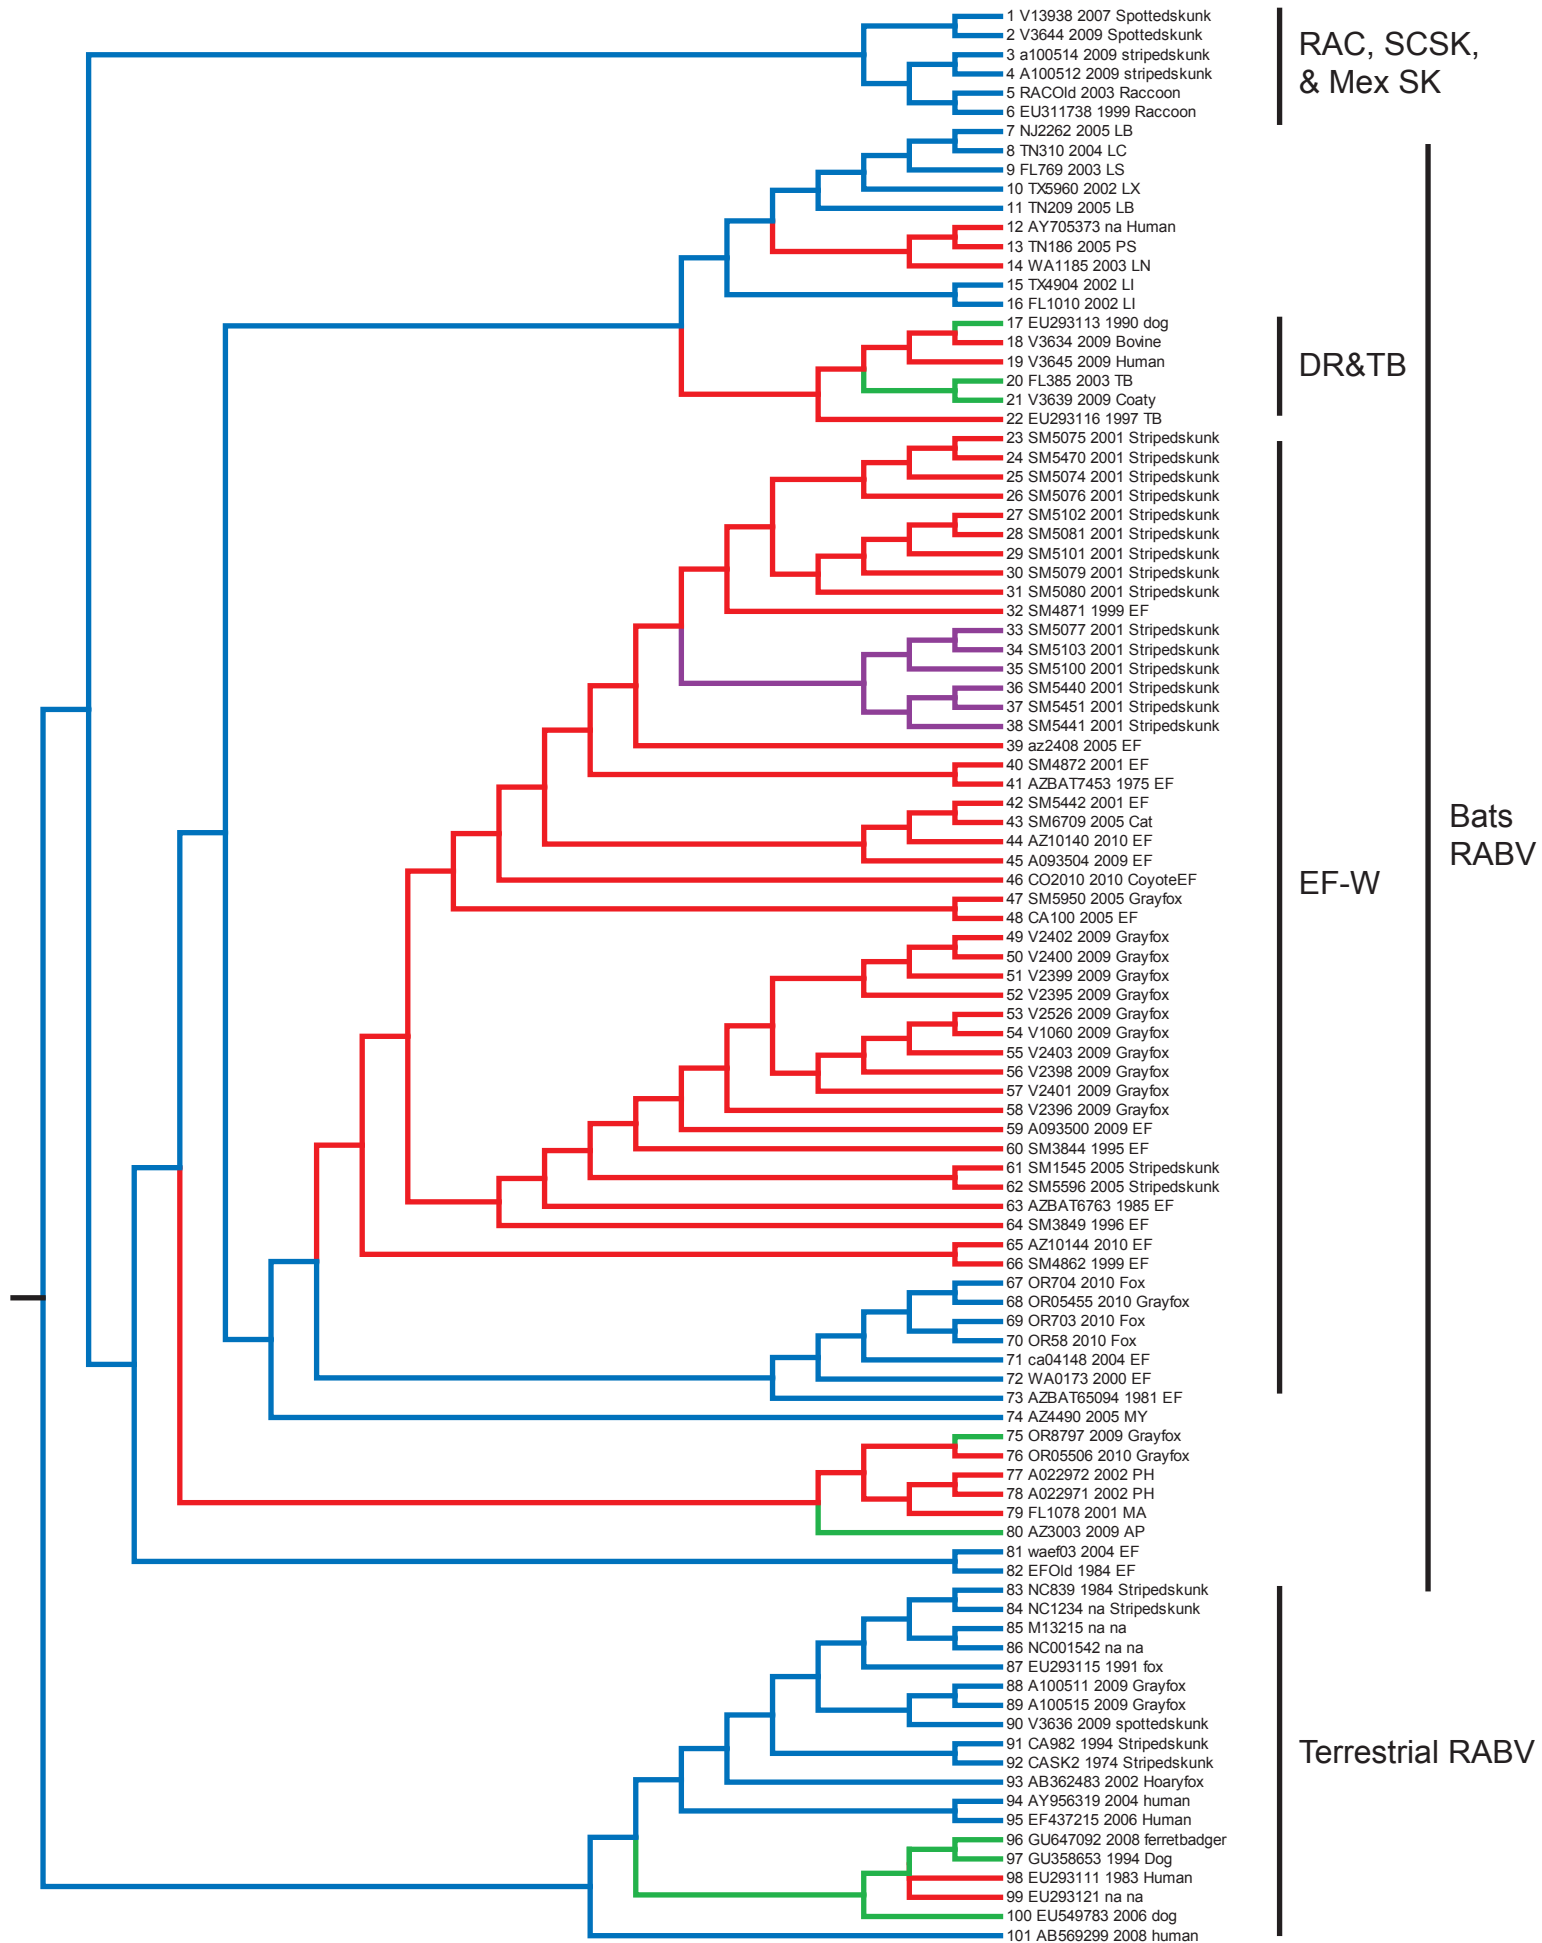

Figure S3H

— H  
— Y

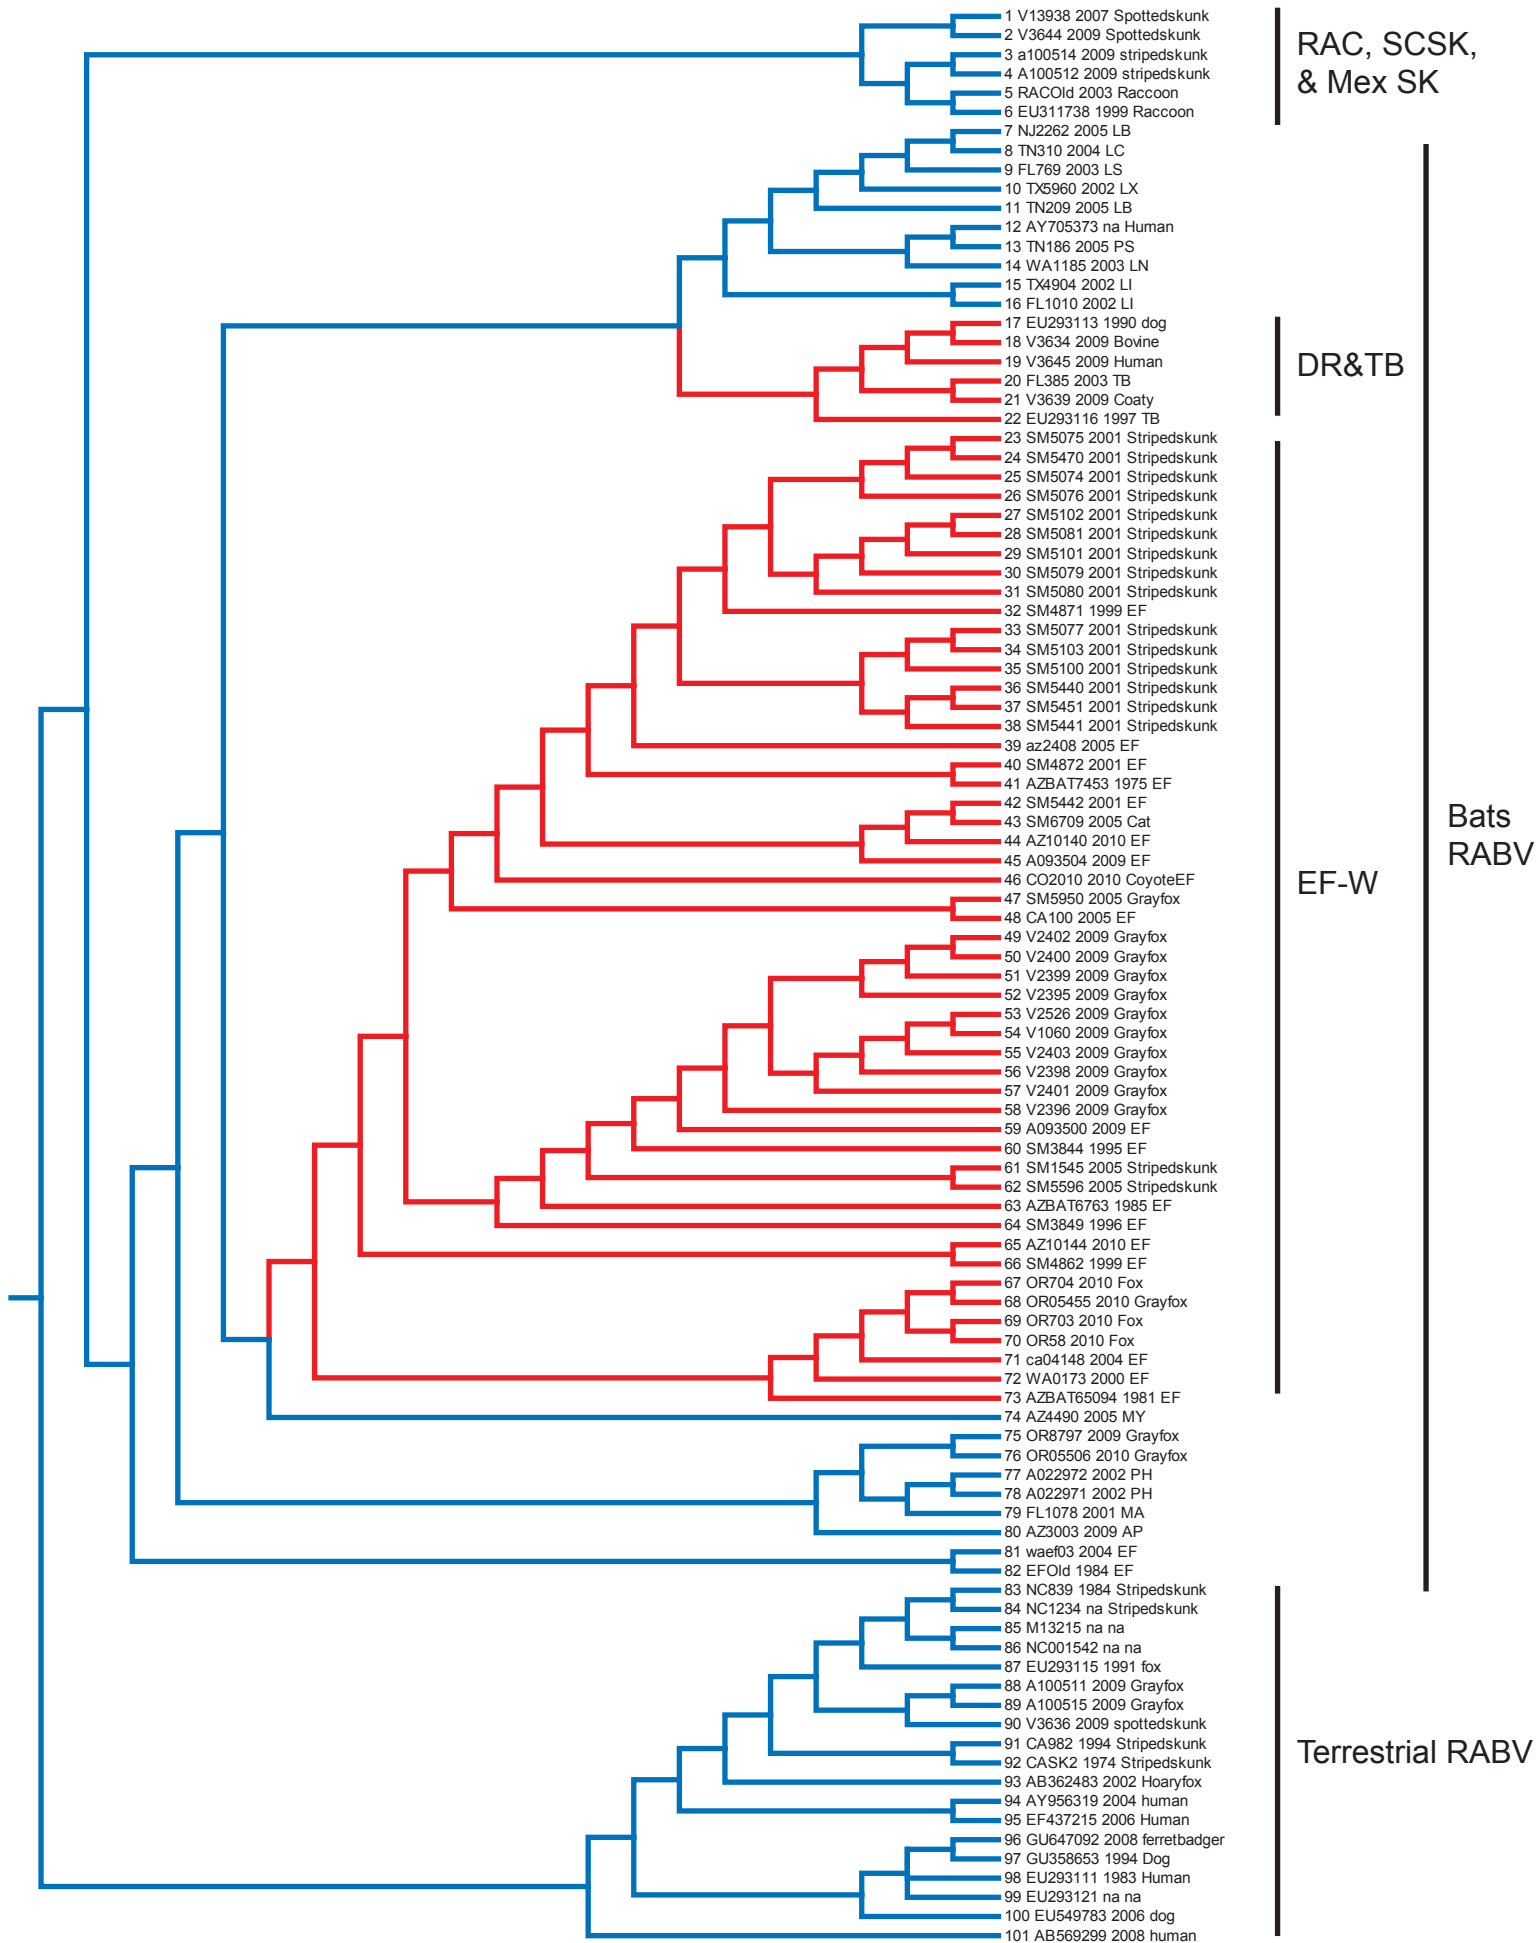

Supplement: ppat.1002786.s003.pdf [file ppat.1002786.s003.pdf]
